# Supplementary material
Source: PubMed Central journal article supplement (PMC6380956)
Supplement: NIHMS1006693-supplement-Supplemental.pdf [file NIHMS1006693-supplement-Supplemental.pdf]

## SUPPORTING INFORMATION

### A new class of phosphoribosyltransferase involved in cobamide biosynthesis is found in methanogenic archaea and cyanobacteria

Victoria L. Jeter<sup>1</sup>, Theodor A. Mattes<sup>1§</sup>, Nathaniel R. Beattie<sup>2</sup>, and Jorge C. Escalante-Semerena<sup>1\*</sup>

<sup>1</sup>Department of Microbiology, <sup>2</sup>Department of Biochemistry & Molecular Biology University of Georgia, Athens, GA 30602

<sup>§</sup>Present address: Department of Genetics, University of Georgia, Athens, GA 30602

\*Corresponding author: Department of Microbiology, University of Georgia, 212C Biological Sciences Building, 120 Cedar Street, Athens, GA 30602, USA; Tel: +1 (706) 542-2651, Fax: (+1 (706) 542-2815, Email: [jcescala@uga.edu](mailto:jcescala@uga.edu), [www.escalab.com](http://www.escalab.com)

Running title: cyanobacteria have a CobT enzyme of archaeal origin

KEYWORDS: a new class of CobT phosphoribosyltransferase, cyanobacteria, B<sub>12</sub> biosynthesis, cobamides, *Methanocaldococcus jannaschii*, archaeal PRTase

| <b>Table S1. Strains used in this study.</b> |                                                                                                         |                              |
|----------------------------------------------|---------------------------------------------------------------------------------------------------------|------------------------------|
| <b>Strains</b>                               | <b>Genotype</b>                                                                                         | <b>Source</b>                |
| <b><i>S. enterica</i><sup>1</sup></b>        |                                                                                                         |                              |
| JE7088                                       | $\Delta metE2702 ara-9$                                                                                 | Laboratory strain collection |
| <b>Derivatives of JE7088</b>                 |                                                                                                         |                              |
| JE11685                                      | / pBAD24                                                                                                |                              |
| JE12872                                      | <i>cobT1379::kan<sup>+</sup></i>                                                                        |                              |
| JE12893                                      | <i>cobT1379::kan<sup>+</sup> cobB1374::cat<sup>+</sup></i>                                              |                              |
| JE17824                                      | <i>cobT1379::kan<sup>+</sup> / pCOBT140</i>                                                             | Laboratory strain collection |
| JE18113                                      | <i>cobT1379::kan<sup>+</sup> / pMjCobT1</i>                                                             | This study                   |
| JE18114                                      | <i>cobT1379::kan<sup>+</sup> cobB1374::cat<sup>+</sup> / pMjCobT1</i>                                   | This study                   |
| JE18115                                      | <i>cobT1379::kan<sup>+</sup> cobB1374::cat<sup>+</sup> / pCOBT140</i>                                   | This study                   |
| JE22263                                      | / pCV1                                                                                                  |                              |
| JE24014                                      | <i>cobT1379::kan<sup>+</sup> cobB1374::cat<sup>+</sup> / pMjCobT3</i>                                   | This study                   |
| JE24016                                      | <i>cobT1379::kan<sup>+</sup> cobB1374::cat<sup>+</sup> / pMjCobT4</i>                                   | This study                   |
| JE24494                                      | <i>cobT1379::kan<sup>+</sup> cobB1374::cat<sup>+</sup> / pMjCobT5</i>                                   | This study                   |
| JE24636                                      | <i>cobT1379::kan<sup>+</sup> cobB1374::cat<sup>+</sup> / pSynCobT2</i>                                  | This study                   |
| <b><i>E. coli</i> strains</b>                |                                                                                                         |                              |
| JE21547                                      | F <sup>-</sup> f80d <i>lacD(lacZ)M15</i> $\Delta(lacZYA-argF)$ U169 <i>deoR recA1 endA1 hsdR17</i> (rK, | Laboratory strain collection |

|                  |                                                                                                                                                                                       |                       |
|------------------|---------------------------------------------------------------------------------------------------------------------------------------------------------------------------------------|-----------------------|
|                  | mK <sup>+</sup> ) <i>phoA supE44 l- thi1 gyrA96 relA1</i>                                                                                                                             |                       |
| JE6663 C41(λDE3) | F <sup>-</sup> <i>ompT hsdSB (rB<sup>-</sup> mB<sup>-</sup>) gal dcm</i> (λDE3)                                                                                                       | Avidis                |
| <b>Plasmids</b>  |                                                                                                                                                                                       |                       |
| pTEV5            | Overexpression vector that fuses the N-terminus of the protein of interest to a H <sub>6</sub> tag, which can be removed by rTEV protease, <i>bla</i> <sup>+</sup> (Ap <sup>R</sup> ) | {Rocco, 2008 #11866}  |
| pBAD24           | complementation vector, P <sub>araBAD</sub> , L-(+)-arabinose inducible promoter, <i>bla</i> <sup>+</sup> (Ap <sup>R</sup> )                                                          | {Guzman, 1995 #25015} |
| pCOBT140         | <i>S. enterica cobT</i> <sup>+</sup>                                                                                                                                                  | {Mattes, 2017 #26254} |
| pMjCobT1         | MJ_RS08515 <i>cobT</i> <sup>+</sup> <i>bla</i> <sup>+</sup> (Ap <sup>R</sup> ) cloned into pBAD24                                                                                     | This study            |
| pMjCobT2         | MJ_RS08515 <i>cobT</i> <sup>+</sup> <i>bla</i> <sup>+</sup> (Ap <sup>R</sup> ) cloned into pTEV5                                                                                      | This study            |
| pMjCobT3         | MJ_RS08515 <i>cobT</i> <sup>+</sup> (CobT <sup>E315A</sup> ) <i>bla</i> <sup>+</sup> (Ap <sup>R</sup> ) cloned into pBAD24                                                            | This study            |
| pMjCobT4         | MJ_RS08515 <i>cobT</i> <sup>+</sup> (CobT <sup>E150A E315A</sup> ) <i>bla</i> <sup>+</sup> (Ap <sup>R</sup> ) cloned into pBAD24                                                      | This study            |
| pMjCobT5         | MJ_RS08515 <i>cobT</i> <sup>+</sup> (CobT <sup>E150A</sup> ) <i>bla</i> <sup>+</sup> (Ap <sup>R</sup> ) cloned into pBAD24                                                            | This study            |
| pSynCobT2        | SYNWH7803_RS09275 <sup>+</sup> <i>bla</i> <sup>+</sup> (Ap <sup>R</sup> ) cloned into pBAD24                                                                                          | This study            |

<sup>1</sup>All strains were derivatives of *Salmonella enterica enterica* sv Typhimurium LT2

| <b>Table S2. Primers used in this study.</b> |                                                   |
|----------------------------------------------|---------------------------------------------------|
| <b>Primer Name</b>                           | <b>Primer Sequence (5'-3')</b>                    |
| Mj_1598_cobT_PIPE_f                          | CAG GAG GAA TTC ACC ATG AGC ATA ATA GCA AT        |
| Mj_1598_cobT_PIPE_rev                        | TTG CAT GCC TGC AGG TCG GCT TTA TTC TTT ATA CCA C |
| pBAD24-PIPE-5'                               | CAT GGT GAA TTC CTC CTG CTA GCC CA                |
| pBAD24-PIPE-3'                               | CGA CCT GCA GGC ATG CAA GCT T                     |
| Mj_1598_TEV5_PIPE_f                          | AAC CTG TAT TTT CAG GGC ATG AGC ATA ATA GCA AT    |
| Mj_1598_TEV5_PIPE_rev                        | AGC TCG AGA ATT CCA TGG GCT TTA TTC TTT ATA CCA C |
| pTEV5-PIPE-5'                                | CAT GGT GAA TTC CTC CTG CTA GCC CA                |
| pTEV5-XhoI-3'                                | CGA CCT GCA GGC ATG CAA GCT T                     |
| MjCobT_sdm_E150A_F                           | GTCCCACCAGGAACACTCGCCCCAACAATTAATAATT             |
| MjCobT_sdm_E150A_R                           | AATTATTAATTGTTGGGGCGAGTGTTCTTGGTGGGAC             |
| MjCobT_sdm_E315A_F                           | CAGCCCCTACTCCTGCTTTTACTGAACCTTTGCA                |
| MjCobT_sdm_E315A_R                           | TGCAAAGGTTTCAGTAAAAGCAGGAGTAGGGGCTG               |
| SynCobT pBAD F                               | NNGCTCTTCNTTCATGGTGTGGCTGCCGAGC                   |
| SynCobT pBAD R                               | NNGCTCTTCNTAATTACGGCGCCGGCGGACG                   |

| <b>Table S3. Methanogen CobT homologues</b>     |                                  |                    |                |
|-------------------------------------------------|----------------------------------|--------------------|----------------|
| <b>Query</b>                                    | <b><i>M. jannaschii</i> CobT</b> |                    |                |
| <b>Homology</b>                                 |                                  |                    |                |
| <b>Methanogen Class I</b>                       |                                  |                    |                |
| <b>Organism</b>                                 | <b>% Identity</b>                | <b>% Positives</b> | <b>E-value</b> |
| <i>Methanocaldococcus</i> sp. FS406-22          | 94                               | 97                 | 0.0            |
| <i>Methanocaldococcus bathoardescens</i>        | 93                               | 97                 | 0.0            |
| <i>Methanocaldococcus fervens</i>               | 89                               | 94                 | 0.0            |
| <b><i>Methanocaldococcus fervens</i> AG86</b>   | <b>88</b>                        | <b>94</b>          | <b>0.0</b>     |
| <i>Methanocaldococcus vulcanius</i>             | 85                               | 92                 | 0.0            |
| <i>Methanotorris igneus</i>                     | 73                               | 84                 | 0.0            |
| <i>Methanocaldococcus villosus</i>              | 73                               | 86                 | 0.0            |
| <i>Methanotorris formicicus</i>                 | 70                               | 84                 | 0.0            |
| <i>Methanothermococcus okinawensis</i>          | 66                               | 81                 | 2e-162         |
| <i>Methanococcus vannielii</i>                  | 66                               | 79                 | 7e-159         |
| <i>Methanothermococcus thermolithotrophicus</i> | 65                               | 78                 | 3e-158         |
| <i>Methanocaldococcus infernus</i>              | 69                               | 82                 | 3e-158         |
| <b><i>Methanocaldococcus infernus</i> ME</b>    | <b>69</b>                        | <b>82</b>          | <b>5e-158</b>  |
| <i>Methanococcus maripaludis</i>                | 62                               | 78                 | 5e-154         |
| <i>Methanococcus maripaludis</i> C6             | 62                               | 77                 | 1e-150         |
| <i>Methanococcus maripaludis</i> C7             | 61                               | 75                 | 1e-148         |
| <i>Methanococcus aeolicus</i>                   | 61                               | 78                 | 6e-148         |
| <i>Methanococcus voltae</i>                     | 58                               | 73                 | 2e-133         |
| <i>Methanothermus fervidus</i>                  | 48                               | 64                 | 5e-90          |
| <i>Methanothermobacter tenebrarum</i>           | 43                               | 61                 | 1e-83          |
| <b>Methanogen Class II</b>                      |                                  |                    |                |
| <b>Organism</b>                                 | <b>% Identity</b>                | <b>% Positives</b> | <b>E-value</b> |
| <i>Methanocella arvoryzae</i>                   | 39                               | 56                 | 8e-65          |
| <i>Methanocella paludicola</i> SANA E *         | 38                               | 54                 | 4e-64          |
| <i>Methanosarcina mazei</i>                     | 37                               | 56                 | 1e-61          |
| <i>Methanosarcina</i> sp. MTP4                  | 38                               | 57                 | 2e-61          |
| <i>Methanohalobium evestigatum</i>              | 38                               | 59                 | 3e-61          |
| <i>Methanosarcina</i> sp. Kolksee               | 36                               | 57                 | 4e-61          |
| <i>Methanosarcina thermophila</i>               | 37                               | 57                 | 1e-60          |
| <i>Methanosarcina vacuolata</i>                 | 36                               | 57                 | 2e-60          |
| <i>Methanosarcina spelaei</i>                   | 37                               | 56                 | 2e-59          |
| <i>Methanosarcina flavescens</i>                | 38                               | 58                 | 2e-59          |
| <i>Methanosalsum zhilinae</i>                   | 36                               | 58                 | 5e-59          |
| <i>Methanosarcina barkeri</i>                   | 36                               | 56                 | 2e-58          |
| <i>Methanosarcina horonobensis</i>              | 37                               | 55                 | 2e-58          |
| <i>Methanosarcina lacustris</i>                 | 37                               | 54                 | 1e-57          |
| <i>Methanohalophilus halophilus</i>             | 39                               | 57                 | 1e-57          |
| <i>Methanococcoides vulcani</i>                 | 37                               | 57                 | 8e-57          |
| <i>Methanosarcina siciliae</i>                  | 36                               | 56                 | 2e-56          |
| <i>Methanosarcina acetivorans</i>               | 36                               | 56                 | 4e-56          |

|                                |    |    |       |
|--------------------------------|----|----|-------|
| <i>Methanohalophilus mahii</i> | 38 | 57 | 4e-56 |
| <i>Methanocella conradii</i>   | 38 | 54 | 3e-55 |

Results from a protein homology search using NCBI BLASTP are shown. *M. jannaschii* CobT coding sequence was used as the query protein to search for homologues in Methanogen Class I (taxid: 2283794) and Methanogen Class II (taxid:224756). The organism name is provided with the identity (%) and similarity (% positives) to the query sequence as well as the E-value. Results shown in bold typeface are annotated as nicotinate-nucleotide-dimethylbenzimidazole phosphoribosyltransferases and results with an asterisk (\*) are annotated as hypothetical or putative proteins. All other hits are annotated as TIGR00303 family proteins. 20 unique results with the highest bit scores are shown for brevity. Only hits with query coverage > 85% are included in the table.

| <b>Table S4. Cyanobacterial CobT homologues to <i>S. enterica</i> LT2 CobT, <i>B. megaterium</i> DSM 319 CobT, and <i>P. denitrificans</i> ATCC 13867 CobT</b> |                                                |                   |                    |
|----------------------------------------------------------------------------------------------------------------------------------------------------------------|------------------------------------------------|-------------------|--------------------|
| <b>Homology</b>                                                                                                                                                |                                                |                   |                    |
| <b>Query</b>                                                                                                                                                   | <b><i>S. Typhimurium</i><sup>1</sup> CobT</b>  | <b>% Identity</b> | <b>% Positives</b> |
| <i>Prochlorothrix hollandica</i> PCC 9006                                                                                                                      |                                                | 38                | 54                 |
| <i>Nostoc</i> sp. 3335mG                                                                                                                                       |                                                | 34                | 50                 |
| <b>Query</b>                                                                                                                                                   | <b><i>B. megaterium</i> DSM 319 CobT</b>       | <b>% Identity</b> | <b>% Positives</b> |
| <i>Prochlorothrix hollandica</i> PCC 9006                                                                                                                      |                                                | 45                | 61                 |
| <i>Nostoc</i> sp. 3335mG                                                                                                                                       |                                                | 40                | 52                 |
| <b>Query</b>                                                                                                                                                   | <b><i>P. denitrificans</i> ATCC 13867 CobT</b> | <b>% Identity</b> | <b>% Positives</b> |
| <i>Prochlorothrix hollandica</i> PCC 9006                                                                                                                      |                                                | 72                | 79                 |
| <i>Nostoc</i> sp. 3335mG                                                                                                                                       |                                                | 48                | 61                 |

Homologues from a protein homology search using NCBI BLASTP are shown. *S. enterica enterica* sv Typhimurium LT2 (*S. Typhimurium*) CobT, *Bacillus megaterium* DSM 319 CobT, and *Pseudomonas denitrificans* ATCC 13867 CobT coding sequences were used as queries to search for homologues in cyanobacteria (taxid:1117). The species name is provided with the identity (%) and similarity (% positives) to the query sequence as well as the E-value. All hits were annotated as nicotinate-nucleotide-dimethylbenzimidazole PRTase. Only hits with query coverage > 90% are included in the table.

| <b>Table S5. Cyanobacterial CobT homologues</b>  |                                  |                    |                |
|--------------------------------------------------|----------------------------------|--------------------|----------------|
| <b>Query</b>                                     | <b><i>M. jannaschii</i> CobT</b> | <b>Homology</b>    |                |
| <b>Bacterium</b>                                 | <b>% Identity</b>                | <b>% Positives</b> | <b>E-value</b> |
| <i>Synechococcus</i> sp. PCC 8807                | 39                               | 56                 | 3e-59          |
| <i>Pleurocapsa minor</i>                         | 40                               | 55                 | 1e-58          |
| <i>Synechococcus</i> sp. NKBG042902              | 38                               | 56                 | 4e-58          |
| <i>Synechococcus</i> sp. BDU 130192              | 38                               | 56                 | 1e-57          |
| <i>Synechococcus</i> sp. PCC 73109               | 38                               | 55                 | 1e-57          |
| <i>Crocospaera watsonii</i>                      | 40                               | 54                 | 4e-57          |
| <i>Synechococcus</i> sp. NIES-970                | 38                               | 56                 | 4e-57          |
| <i>Synechococcus</i> sp. PCC 7117                | 38                               | 56                 | 5e-57          |
| <i>Roseofilum reptotaenium</i> AO1-A             | 36                               | 56                 | 2e-56          |
| <i>Synechococcus</i> sp. PCC 7003                | 37                               | 57                 | 3e-56          |
| <i>Geminocystis</i> sp. NIES-3708                | 38                               | 55                 | 8e-56          |
| <i>Gloeobacter kilaueensis</i>                   | 34                               | 56                 | 3e-55          |
| <i>Microcystis aeruginosa</i>                    | 39                               | 56                 | 6e-55          |
| <i>Phormidesmis priestleyi</i>                   | 38                               | 55                 | 1e-54          |
| <i>Leptolyngbya frigida</i>                      | 37                               | 54                 | 1e-54          |
| <i>Trichodesmium erythraeum</i>                  | 35                               | 56                 | 2e-54          |
| <i>Lyngbya aestuarii</i>                         | 35                               | 53                 | 2e-54          |
| <i>Limnothrix rosea</i>                          | 36                               | 54                 | 3e-54          |
| <i>Cyanothece</i> sp. PCC 7424                   | 39                               | 54                 | 3e-54          |
| <i>Limnoraphis robusta</i> CS-951                | 36                               | 54                 | 4e-54          |
| <i>Hydrococcus rivularis</i>                     | 39                               | 53                 | 7e-54          |
| <i>Limnoraphis robusta</i>                       | 36                               | 54                 | 8e-54          |
| <i>Lyngbya</i> sp. PCC8106                       | 34                               | 56                 | 1e-53          |
| <i>Microcystis</i> sp. 0824                      | 39                               | 56                 | 1e-53          |
| <i>Leptolyngbya</i> sp. PCC 7376                 | 35                               | 55                 | 2e-53          |
| <i>Merismopedia glauca</i>                       | 37                               | 52                 | 3e-53          |
| <b><i>Pseudanabaena</i> sp. ABRG5-3</b>          | <b>37</b>                        | <b>55</b>          | <b>5e-53</b>   |
| <i>Leptolyngbya</i> sp. 'hensonii'               | 36                               | 53                 | 5e-53          |
| <i>Microcystis</i> sp. MC19                      | 39                               | 55                 | 5e-53          |
| <i>Cyanothece</i> sp. CCY0110                    | 37                               | 53                 | 6e-53          |
| <i>Cyanothece</i> sp. BG0011                     | 38                               | 53                 | 1e-52          |
| <i>Microcystis</i> sp. T1-4                      | 39                               | 55                 | 1e-52          |
| <i>Synechocystis</i> sp. PCC 7509                | 37                               | 53                 | 1e-52          |
| <i>Nostoc</i> sp. PCC7524                        | 37                               | 52                 | 5e-52          |
| <i>Chamaesiphon minutus</i>                      | 34                               | 53                 | 6e-52          |
| <i>Planktothricoides</i> sp. SR001               | 34                               | 51                 | 9e-52          |
| <i>Phormidium ambiguum</i>                       | 36                               | 53                 | 1e-51          |
| <i>Rivularia</i> sp. PCC 7116                    | 34                               | 51                 | 1e-51          |
| <i>Dactylococcopsis salina</i>                   | 37                               | 53                 | 2e-51          |
| <b><i>Microcystis panniformis</i> FACHB-1757</b> | <b>39</b>                        | <b>55</b>          | <b>2e-51</b>   |
| <i>Chroococciopsis cubana</i>                    | 36                               | 53                 | 2e-51          |
| <i>Euhalothece</i> sp. KZN 001                   | 37                               | 53                 | 2e-51          |
| <i>Anabaena</i> sp. PCC 7108                     | 36                               | 50                 | 3e-51          |
| <i>Chroococciopsis thermalis</i>                 | 36                               | 53                 | 3e-51          |

|                                              |           |           |              |
|----------------------------------------------|-----------|-----------|--------------|
| <i>Calothrix</i> sp. 336/3                   | 37        | 53        | 3e-51        |
| <i>Chroococciopsis</i> sp. CCALA 051         | 36        | 53        | 3e-51        |
| <i>Aphanothece hegwaldii</i>                 | 36        | 53        | 4e-51        |
| <b><i>Cyanobacterium</i> sp. HL-69</b>       | <b>36</b> | <b>52</b> | <b>5e-51</b> |
| <i>Nodosilinea nodulosa</i>                  | 36        | 53        | 6e-51        |
| <i>Cyanbacterium</i> TDX16                   | 36        | 53        | 7e-51        |
| <i>Phormidium tenue</i>                      | 37        | 55        | 1e-50        |
| <i>Cyanothece</i> sp. PCC 8802               | 39        | 52        | 1e-50        |
| <i>Leptolyngbya</i> sp. NIES-3755            | 38        | 54        | 1e-50        |
| <i>Oscillatoriales cyanobacterium</i> JSC-12 | 37        | 53        | 1e-50        |
| <i>Microcystis aeruginosa</i> PCC 9443       | 37        | 54        | 1e-50        |
| <i>Hydrocoleum</i> sp. CS-953                | 35        | 52        | 1e-50        |
| <i>Stanieria</i> sp. NIES-3757               | 36        | 53        | 2e-50        |
| <i>Desertifilum</i> sp. IPPAS B-1220         | 34        | 54        | 2e-50        |
| * <i>Nostoc</i> sp. HK-01                    | 36        | 53        | 3e-50        |
| <i>Pleurocapsa</i> sp. PCC 7319              | 34        | 52        | 3e-50        |
| <i>Leptolyngbya</i> sp. NIES-2104            | 39        | 55        | 3e-50        |
| <i>Leptolyngbya ohadii</i>                   | 36        | 52        | 4e-50        |
| <i>Calothrix elsteri</i>                     | 35        | 53        | 4e-50        |
| <i>Aliterella atlantica</i>                  | 37        | 52        | 5e-50        |
| <i>Anabaenopsis circularis</i>               | 37        | 52        | 5e-50        |

Results from a protein homology search using NCBI BLASTP are shown. *M. jannaschii* CobT coding sequence was used as the query protein to search for homologues in cyanobacteria (taxid:1117). The species name is provided with the identity (%) and similarity (% positives) to the query sequence as well as the E-value. Homologues shown in bold typeface are annotated as nicotinate-nucleotide-dimethylbenzimidazole phosphoribosyltransferases and homologues with an asterisk (\*) are annotated as hypothetical proteins. All other proteins are annotated as TIGR00303 family proteins. Only homologues with query coverage >90% are included in the table.

| <b>Table S6. Thaumarchaeota CobT homologues</b>      |                                  |                    |                |
|------------------------------------------------------|----------------------------------|--------------------|----------------|
| <b>Query</b>                                         | <b><i>M. jannaschii</i> CobT</b> | <b>Homology</b>    |                |
| <b>Organism</b>                                      | <b>% Identity</b>                | <b>% Positives</b> | <b>E-value</b> |
| <i>Candidatus Nitrososphaera evergladensis</i> SR1   | 42                               | 60                 | 5e-74          |
| <i>Candidatus Nitrososphaera gargensis</i> Ga9.2 *   | 42                               | 58                 | 6e-73          |
| <i>Candidatus Nitrosocaldus islandicus</i>           | 39                               | 58                 | 2e-69          |
| <b><i>Candidatus Nitrosocaldus cavascurensis</i></b> | <b>39</b>                        | <b>58</b>          | <b>2e-69</b>   |
| <i>Candidatus Nitrocosmicus oleophilus</i> *         | 39                               | 58                 | 3e-69          |
| <i>Candidatus Nitrosoarchaeum</i> sp. *              | 40                               | 60                 | 1e-65          |
| <i>Thaumarchaeota archaeon</i> CSP1-1 *              | 39                               | 59                 | 3e-64          |
| <i>Thaumarchaeota archaeon</i> SCGC AC-337_F14       | 39                               | 58                 | 7e-64          |
| <i>Nitrosopumilales archaeon</i>                     | 39                               | 57                 | 3e-63          |
| <i>Nitrosoarchaeum koreense</i>                      | 39                               | 58                 | 6e-63          |
| <i>Candidatus Nitrosotenus chungbukensis</i>         | 38                               | 59                 | 5e-62          |
| <b><i>Nitrosopumilus</i> sp. PRT-SC01</b>            | <b>37</b>                        | <b>58</b>          | <b>1e-61</b>   |
| <i>Candidatus Nitrosopumilus salaria</i>             | 37                               | 57                 | 2e-61          |
| <i>Candidatus Nitrosopumilus salaria</i> BD31 *      | 37                               | 57                 | 3e-61          |
| <i>Candidatus Nitrosoarchaeum limnia</i>             | 39                               | 59                 | 3e-61          |
| <i>Candidatus Nitrosopumilus adriaticus</i>          | 39                               | 58                 | 4e-61          |
| <i>Candidatus Nitrosopumilus piranensis</i> *        | 39                               | 59                 | 1e-60          |
| <i>Candidatus Nitrosoarchaeum limnia</i> SFB1 *      | 39                               | 59                 | 3e-60          |
| <i>Thaumarchaeota archaeon</i> N4                    | 34                               | 56                 | 3e-59          |
| <i>Nitrosopumilus maritimus</i> SCM1                 | 38                               | 58                 | 2e-58          |
| <i>Candidatus Nitrosopumilus</i> sp. NM25            | 35                               | 57                 | 2e-58          |
| <i>Candidatus Nitrosotenus aquarius</i>              | 34                               | 56                 | 8e-57          |
| <i>Candidatus Nitrosomarinus</i> sp.                 | 37                               | 56                 | 2e-56          |
| <i>Nitrosopumilus</i> sp. Nsub                       | 37                               | 56                 | 1e-55          |
| <i>Candidatus Nitrosotenus cloacae</i>               | 35                               | 57                 | 2e-55          |
| <i>Candidatus Nitrosomarinus Catalina</i>            | 37                               | 56                 | 9e-55          |
| <i>Candidatus Nitrosopelagicus</i> sp.               | 38                               | 54                 | 7e-53          |
| <i>Candidatus Nitrosopelagicus brevis</i>            | 35                               | 52                 | 2e-50          |

Results from a protein homology search using NCBI BLASTP are shown. *M. jannaschii* CobT coding sequence was used as the query protein to search for homologues in Thaumarchaeota (taxid: 651137). The organism name is provided with the identity (%) and similarity (% positives) to the query sequence as well as the E-value. Results shown in bold typeface are annotated as nicotinate-nucleotide-dimethylbenzimidazole phosphoribosyltransferases and results with an asterisk (\*) are annotated as hypothetical or putative proteins. All other hits are annotated as TIGR00303 family proteins. Only hits with query coverage > 90% are included in the table. Results from organisms listed as “uncultured marine thaumarchaeote” were omitted from the table.

1 10 20 30 40 50 60  
Native ATGGTCTGGTTGGCCCTCGATCCCCTCTGAGCTCCCTGCCGGCTGTCGCGGTGACAGGGGCAT  
Optimized ATGGTGTGGCTGGCCGAGCATTCCGAGCGAAGTCCGCCGGCGGCTGTCGTCGTCGACCCGGTGC

70 80 90 100 110 120  
Native CCCCAGGAGCCGGAGCCACAGCCCTACGCAACCGCTGGCAATCCAGGCCGTACCACGCCGGA  
Optimized GCCCAGGTGCGGTGCAGCCGCGCTGCGTAACCGTGGCAGAGCCAGAGCGCTGCCGACC

130 140 150 160 170 180 190  
Native CTGTTTGCTGGTGGCTCGCCTCACCCCGCTCCGCTGAGGTTCCAGGGATCTCCGCTGCTGGATGC  
Optimized CTGCCCTGCTGGTGGCTGGCGAGCACCCGTAGCGCGGAAGTCCCGGTTATTAGCGCGCCGGTGC

200 210 220 230 240 250  
Native ACGGAGCAGCGCGTCCGACCACGGCTCTCGCCGATGCCGAGCTGCTGATTCATGGCCCGGGTG  
Optimized ACCGCGGCGCGCGTCCGACCACCGCGCTGGCGGATGCCGAACTGCTGATTCATGGTCCCGGCG

260 270 280 290 300 310 320  
Native TGCCCTCCGCGCTGGCCGCTGCCCCCGCTCCCTGCAAGCGCTGTCAACAGCGTTGATCAGCAGGGT  
Optimized TGCCGCCGCGCTGGCCGCTGCCGCCGCTGCCGGCGGGTGTAGCCCGCGCTGATCAGCCGTGT

330 340 350 360 370 380  
Native TGTTCGCGAAACAATCCCGCTCAATCTCCAGGTGGCAGCCCTTGGCTTGGCATGAGCCCTCC  
Optimized GGTTCGCGAAACATCCCGCTGAACTCCAGGTGGCGCCCTGGTCTGGCATGAGCCGCC

390 400 410 420 430 440  
Native TTCCCCTATCTTCGCTTTCGAGGCCTCCGCGCCATGGTCCGCGCGCTGCATCAGCGGTGGTGC  
Optimized TTCCCGCATCTGCTTTGAGGCGCCGCTCATGGTCCGCCGCTTGCATTAGCGGTGGCGCG

450 460 470 480 490 500 510  
Native CGATGGACCCCGAGCGAGTGGACCACTGATCCACCGGGGGACACCGCATGGGCCGCAACCTGCG  
Optimized CGATGGACCCGGAGCGTGTGGATCAACTGATTCACCGTGGCACCGTATGGGCCGTAACCTGCG

520 530 540 550 560 570  
Native CAGGCCCTGGTTTGGCGGAGTGGCTGCCGGGTGGGACCACACGGCGCTGGCGGTGCTCAG  
Optimized TCGTCCGCTGGTGCAGCGGAATGGCTTCCGGGTGGCACCACACCGCGCTGGCGGTCTGAC

580 590 600 610 620 630 640  
Native GGCCTCGGCTTCTTGTGACCCAACTCGTGAGTGGAGCGCTCTGCATCCACCGATGGCGCTCA  
Optimized GGTCTGGGCTGCGGGTGAACCAACTGGTAGCGGTAGCGCTCTGCACCCGCCGATGGCGCTGA

650 660 670 680 690 700  
Native AGCAGGAGCTTGTCCGAGAGGGCTGTCGGCGATCGCGCTGGCACCCTGATCCGCAGGCGCT  
Optimized AGCAAGAGCTGTTGCAGGAAGTCTGAGCGGATTCGCCCGGGCACCACCGACCCGCAGGCGCT



710 720 730 740 750 760

Native GCTGGCGGCGGTTGGGATCCTTTTCAGGCGCTCACGATGGGTGTGTGCTGGGGCGGTTGAG  
 Optimized GCTGGCGGCGGTTGGTGATCCGTTCCAAAGCGCTGACCATGGGTGTGCTGCTGGGTGCGGTTGAG

770 780 790 800 810 820 830

Native AGGATCAACCATCCTTCTGGCCGGAGGCAGCCAGATGGTGGCGGTCTGGCTCTTGCCTGG  
 Optimized CGTGACCAAGCCGATCTGCTGGCCGGTGGCAGCCAAATGGTGGCGGTCTGGCCGCTGGCGCTGG

840 850 860 870 880 890

Native CAGCGCTGCCAGCACACCAGCGCAACTTCTCTGCCACAAGGTGATGCTGGGACCACGGCATG  
 Optimized CGGCGCTGCCGGCGCACCAGCGTCAACTGTGTGCCACCGTGTATGCTGGGACCACCGCGTG

900 910 920 930 940 950

Native GTTGGCGACGGAATCGCTGGAGTCAAGCGACCGGTTCTCATC..CCTCGAAGCCCTGCTGCTTC  
 Optimized GCTGGCGACCGAGAGCCTGGAAAGCGCGACCGG..CAGCAGCAGCCCTGGAGGCGCTGCTGCTGC

960 970 980 990 1000 1010 1020

Native GCCTTGAACAGCACTTCGGCATTGCCCTTGGAGGCCATATGCAGCGGGGTGCGGTTCTCCACAG  
 Optimized GTCTTGAACAGCACTTTGGTATTGCCCTTGGAAAGCCTATCGCGCGCGGGCCCTGCGTTCTAGCCACAG

1030 1040 1050 1060 1070 1080

Native TCGCATCAACAATTCGCGGACTTTGAATCCGGTTACGTGAAGGAAGGGTGGGTGCCGGGGGG  
 Optimized CCGTCAACAGCAACTTCGCGTGAATTTGAGAGCGGTTATGTGAAGAAGGTGTGGGTGCCGGTGGC

1090 1100 1110 1120 1130 1140 1150

Native CTGGCCCTGCTGGCGGCCTTGCCCGGGGTGGACCACGGCACGCTGCTGCAGGGGTGCTGACGATG  
 Optimized CTGGCGCTGCTGGCGGCGCTTGCCCTGGTGTGATCACGGCACCTGCTGCAGGGCTGCTGATGATG

1160 1170 1180 1190 1200

Native CGATGGATCGGTGCTGCAGGCGCAGGGTCCGTCCTCCGCCCGCCCTTAG  
 Optimized CGATGGACCGTCTGCTGCAGAGCGCAAGGTTCGTCCTCCGCCGCGCCGTA

Figure S1. Nucleotide differences between the native nucleotide sequence of *Synechococcus sp.* WH7803 *cobT* and the nucleotide sequence optimized for expression in *E. coli*. Changes made for optimal expression in *E. coli* are shown in red bold typeface.
